# Supplementary material for: Simultaneous Detection of Exosomal microRNAs Isolated from Cancer Cells Using Surface Acoustic Wave Sensor Array with High Sensitivity and Reproducibility
Source: MDPI journal article supplement (doi:10.3390/mi15020249), 2024-02-07
Supplement: s1 [file s1]

# Simultaneous Detection of Exosomal microRNAs Isolated from Cancer Cells Using Surface Acoustic Wave Sensor Array with High Sensitivity and Reproducibility

Su Bin Han and Soo Suk Lee\*

Department of Pharmaceutical Engineering, Soonchunhyang University, 22 Soonchunhyang-ro, Shinchang-myeon, Asan-si, Chungcheongnam-do, 31538, Republic of Korea; 1gkstkfkd@naver.com (S. B. H)

\* Correspondence: sslee0810@sch.ac.kr (S.S.L); Tel.: +82-41-530-1394

## 1) Optimization of the concentration of the immobilized capture probe

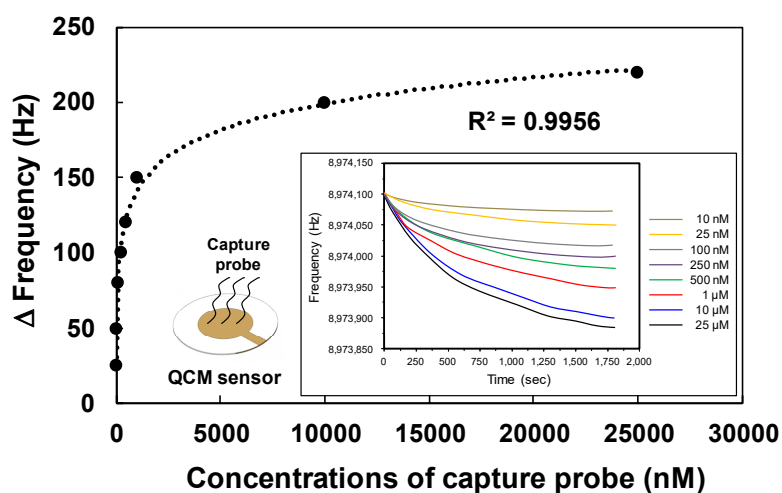

**Figure S1.** Concentration optimization of the immobilized capture probe (complementary sequence to the miR-21, 5'-H<sub>2</sub>N-(CH<sub>2</sub>)<sub>6</sub>-TCA ACA TCA GTC TGA TAA GCT ACC CGG GCC CG-3') tested using a 9 MHz quartz crystal microbalance (QCM) resonator. When the probe concentration reaches 25  $\mu$ M, saturation begins to occur.

## 2) Gel electrophoresis images of sandwich hybridization assay

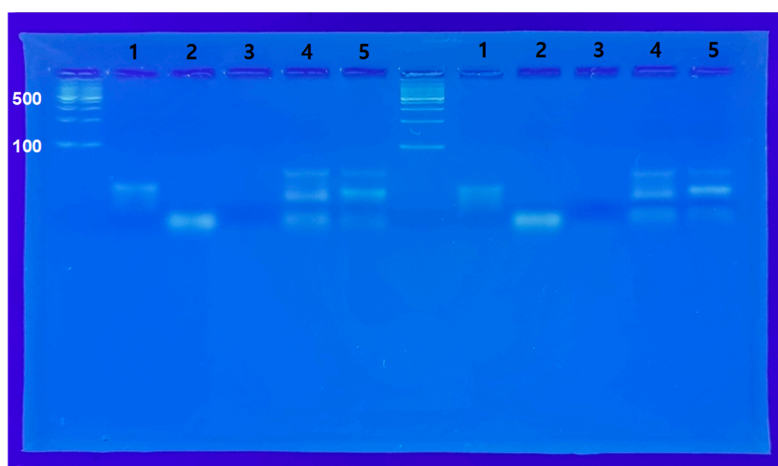

**Figure S2.** Gel electrophoresis images of sandwich hybridization assay. lane 1, capture probe (complementary sequence to the miR-106b, 31 bps); lane 2, miR-106b (21 bps); lane 3, detecting probe (10 bps); lane 4, partial hybridization (1 + 2); lane 5, sandwich hybridization (1 + 2 + 3).

## 3) Comparison of changes in resonance frequency depending on the labeling method

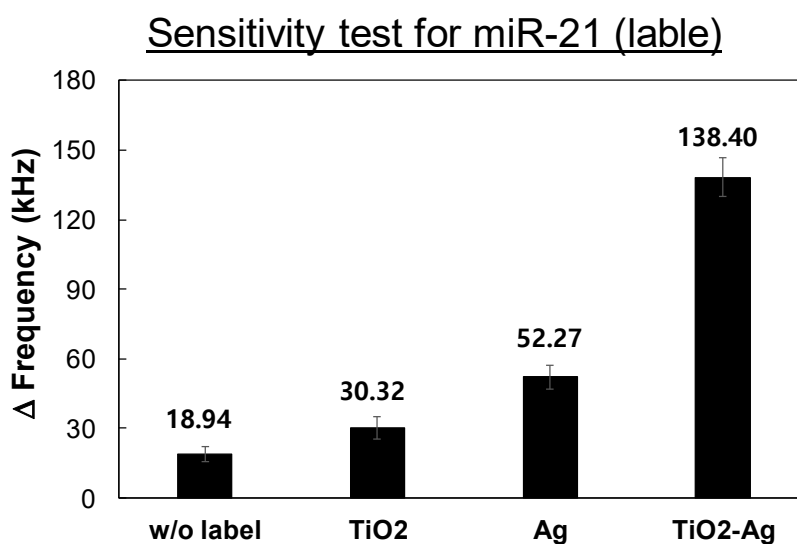

**Figure S3.** Comparison of changes in resonance frequency of SAW biosensors for detecting miR-21 depending on the labeling method to the detecting probe. The labeling of TiO<sub>2</sub> nanoparticles and photocatalytic silver staining show the largest signal change compared to other methods. The concentration of miR-21 was 10 nM.

#### 4) The result of the sensor without target RNA (A blank test)

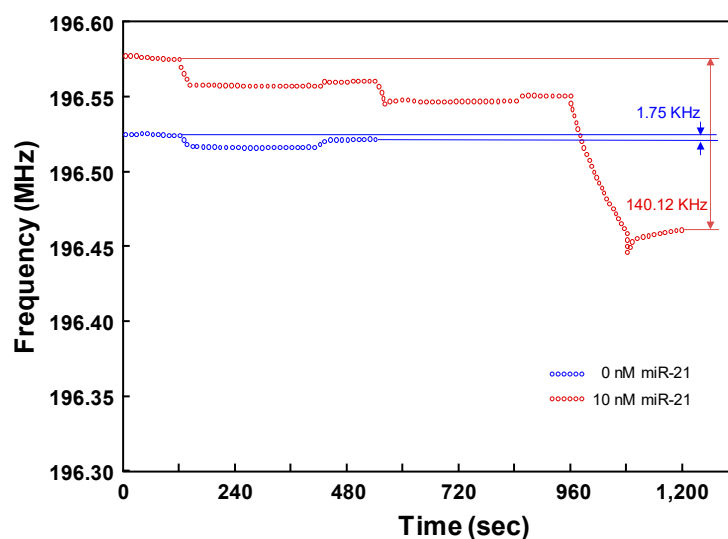

**Figure S4.** SAW sensor response due to sandwich hybridization and subsequent  $\text{TiO}_2$ -mediated silver staining reaction. A decrease in frequency indicates an increase in the effective mass of the sensor chip. Blank (blue dotted line) and 10 nM concentration of the synthetic miR-21 (red dotted line) was used in this experiment.

#### 5) Selectivity of the SAW sensor array

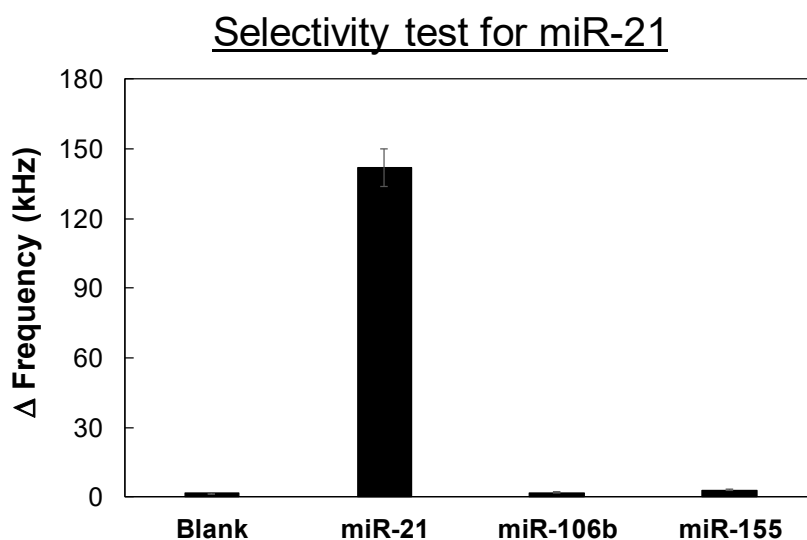

**Figure S5.** Selectivity of the SAW biosensor toward miR-21 in comparison with two other miRNA samples. miR-21 shows a more than 50 times larger signal compared to the other non-complementary miRNAs (miR-106b and miR-155) and blank sample. The concentrations of four miRNAs were 10 nM.
